# Supplementary material for: Use of Ultra Wide Band Real-Time Location System on Construction Jobsites: Feasibility Study and Deployment Alternatives
Source: Int J Environ Res Public Health. 2020 Mar 26;17(7):2219. doi: 10.3390/ijerph17072219 (PMC7177666; doi:10.3390/ijerph17072219)
Supplement: Supplementary file 1 [file ijerph-17-02219-s001.xlsx]

## Sheet: Figure 7
Station point	Single tag	All tags simultaneoulsly
1	0.07	0.2
2	0.16	1
3	0.07	0.28
4	0.1	0.28
5	0.08	0.07
6	0.21	0.12
7	0.24	0.66
8	0.21	0.67
9	0.26	0.11
10	0.16	0.2
11	0.13	0.28
12	0.21	0.19
13	0.35	0.35
14	0.19	1.26
ST-1	0.12	0.12
ST-2	0.16	0.43
ST-3	0.1	0.23
ST-4	0.16	0.26
ST-5	0.39	0.21
Mean value	0.177368	0.364211

## Sheet: Figure 8
Station point	Single tag	All tags simultaneoulsly
1	0.13	0.37
2	0.32	2.38
3	0.12	0.46
4	0.13	0.41
5	0.12	0.11
6	0.27	0.15
7	0.56	1.19
8	0.35	0.83
9	0.52	0.14
10	0.2	0.23
11	0.25	0.5
12	0.41	0.23
13	0.77	0.7
14	0.19	2.16
ST-1	0.14	0.12
ST-2	0.17	0.59
ST-3	0.2	0.29
ST-4	0.3	0.26
ST-5	0.85	0.28
Mean value	0.315789	0.6

## Sheet: Figure 9
Station point	Single tag	All tags simultaneoulsly
1	0.5	1.11
2	0.35	1.93
3	0.98	0.94
4	0.54	0.94
5	0.13	0.66
6	0.95	0.94
7	0.56	1.75
8	1.06	1.04
9	0.46	1.07
10	0.68	0.81
11	0.4	1.06
12	0.9	1.94
13	0.76	0.91
14	0.83	1.98
ST-1	0.13	0.27
ST-2	0.19	0.61
ST-3	0.37	0.91
ST-4	0.4	0.48
ST-5	0.71	0.76
Mean value	0.573684	1.05842

## Sheet: Figure 10
Station point	Single tag	All tags simultaneoulsly
1	0.55	1.3
2	0.49	3.09
3	1.09	0.99
4	0.68	1.04
5	0.16	0.91
6	1.62	1.54
7	0.81	2.85
8	1.34	1.28
9	0.74	1.89
10	1.22	1.1
11	0.69	1.35
12	1.17	2.28
13	1.3	1.21
14	1.07	2.73
ST-1	0.15	0.28
ST-2	0.21	0.76
ST-3	0.51	1.16
ST-4	0.73	0.48
ST-5	1.09	0.86
Mean value	0.822105	1.42632

## Sheet: Figure 11
Station point	Wired setup	Wireless
1	0.07	2.87
2	0.16	2.32
3	0.07	3.11
4	0.1	1.59
5	0.08	1.51
6	0.21	1.03
7	0.24	1.58
8	0.21	1.59
9	0.26	0.96
10	0.16	1.11
11	0.13	1.64
12	0.21	1.15
13	0.35	3.26
14	0.19	2.3
ST-01	0.12	3.22
ST-02	0.16	3.65
ST-03	0.1	1.02
ST-04	0.16	1.92
ST-05	0.39	1.99
Mean value	0.177368	1.99053

## Sheet: Figure 12
Station point	Wired setup	Wireless
1	0.5	3.26
2	0.35	3.13
3	0.98	3.28
4	0.54	2.3
5	0.13	1.93
6	0.95	1.94
7	0.56	2.63
8	1.06	2.93
9	0.46	1.33
10	0.68	1.5
11	0.4	3.61
12	0.9	2.12
13	0.76	3.53
14	0.83	2.64
ST-01	0.13	3.79
ST-02	0.19	3.91
ST-03	0.37	1.62
ST-04	0.4	2.27
ST-05	0.71	2.67
Mean value	0.573684	2.65211

## Sheet: Figure 13
Station pt.	Full Site Access	Offsite Setup	Partial Access
1	0.07	0.1	0.13
2	0.16	1.41	0.28
3	0.07	0.35	0.15
4	0.1	0.25	0.15
5	0.08	0.34	0.15
6	0.21	0.09	0.13
7	0.24	0.43	0.22
8	0.21	0.74	0.14
9	0.26	0.42	0.49
10	0.16	0.97	0.18
11	0.13	0.27	0.2
12	0.21	0.21	0.55
13	0.35	2.57	0.47
14	0.19	3.02	0.5
ST-01	0.12	0.03	0.16
ST-02	0.16	0.37	0.05
ST-03	0.1	0.5	0.09
ST-04	0.16	3.8	1.24
ST-05	0.39	3.48	0.71
Mean value	0.177368	1.01842	0.315263

## Sheet: Figure 14
Station pt.	Full Site Access	Offsite Setup	Partial Access
1	0.5	0.18	0.68
2	0.35	1.42	1.09
3	0.98	1.11	1.07
4	0.54	0.56	0.83
5	0.13	0.36	1.04
6	0.95	0.38	0.73
7	0.56	0.51	0.33
8	1.06	0.9	0.19
9	0.46	0.86	1.05
10	0.68	1.17	0.86
11	0.4	0.78	0.97
12	0.9	0.9	1.1
13	0.76	2.74	0.88
14	0.83	3.16	1.08
ST-01	0.13	0.05	0.58
ST-02	0.19	0.4	0.66
ST-03	0.37	0.69	0.12
ST-04	0.4	3.9	1.47
ST-05	0.71	3.58	0.78
Mean value	0.573684	1.24474	0.816316

## Sheet: Figure 15
Station pt.	Full Site Access	Offsite Setup	Partial Access
1	0.13	0.12	0.29
2	0.32	1.8	0.6
3	0.12	0.69	0.18
4	0.13	0.3	0.31
5	0.12	0.42	0.21
6	0.27	0.13	0.23
7	0.56	0.7	0.3
8	0.35	1.24	0.19
9	0.52	0.67	0.61
10	0.2	1.73	0.28
11	0.25	0.83	1.18
12	0.41	0.41	1.06
13	0.77	4.41	0.83
14	0.19	4.95	0.73
ST-01	0.14	0.04	0.3
ST-02	0.17	0.44	0.09
ST-03	0.2	0.83	0.13
ST-04	0.3	4.88	2.19
ST-05	0.85	5.49	1.02
Mean value	0.315789	1.58316	0.564737

## Sheet: Figure 16
Station pt.	Full Site Access	Offsite Setup	Partial Access
1	0.55	0.2	1
2	0.49	1.8	1.3
3	1.09	1.26	1.15
4	0.68	0.62	0.97
5	0.16	0.44	1.18
6	1.62	0.47	0.9
7	0.81	0.71	0.54
8	1.34	1.36	0.23
9	0.74	1.28	1.28
10	1.22	1.99	1.12
11	0.69	0.94	1.19
12	1.17	1.17	1.57
13	1.3	4.51	1.27
14	1.07	5.14	1.27
ST-01	0.15	0.07	0.95
ST-02	0.21	0.54	1.01
ST-03	0.51	1.07	0.18
ST-04	0.73	5.01	2.23
ST-05	1.09	5.76	1.11
Mean value	0.822105	1.80737	1.07632

[truncated: 4 more sheets: Figure 17, Figure 18, Figure 19, Figure 20]
